# Supplementary material for: Comparison of Gut Microbiota between Sasang Constitutions
Source: Hindawi journal article supplement (doi:10.1155/2013/171643), 2013-01-01
Supplement: f1 [file 171643.f1.pdf]

## Supplementary data

Supplementary table 1. P-values for Homogeneity

| Characteristics             | p-value |
|-----------------------------|---------|
| Age (year)                  | 0.2130  |
| Systolic (mmHg)             | 0.2662  |
| Diastolic (mmHg)            | 0.5789  |
| Heart rate                  | 0.0856  |
| Height (cm)                 | 0.0708  |
| Weight (kg)                 | 0.0654  |
| BMI (kg/m <sup>2</sup> )    | 0.7684  |
| Waist circumference (mm)    | 0.5403  |
| Waist-hip ratio             | 0.0293  |
| Lean body mass (kg)         | 0.1028  |
| Fat mass (kg)               | 0.8744  |
| Fat percent                 | 0.6345  |
| Fasting blood sugar (mg/dl) | 0.7728  |
| Triglyceride (mg/dl)        | 0.3707  |
| HDL-cholesterol (mg/dl)     | 0.8252  |
| Total cholesterol (mg/dl)   | 0.9808  |

p-value derived from Levene's test

Supplementary table 2. P-values for Normality Test

| Characteristics             | So-Yang (SY) | So-Eum (SE) | Tae-Eum (TE) | p-value <sup>a</sup> | p-value <sup>b</sup> |
|-----------------------------|--------------|-------------|--------------|----------------------|----------------------|
| Age (year)                  | 0.1923       | 0.0018      | 0.0012       | 0.0356               | 0.1003               |
| Systolic (mmHg)             | 0.2945       | 0.9336      | 0.8553       | 0.5670               | 0.4724               |
| Diastolic (mmHg)            | 0.3204       | 0.1404      | 0.4454       | 0.9201               | 0.9015               |
| Heart rate                  | 0.0510       | 0.5544      | 0.3632       | 0.1849               | 0.6062               |
| Height (cm)                 | 0.7463       | 0.3389      | 0.3122       | <0.0001              | 0.0008               |
| Weight (kg)                 | 0.9127       | 0.7658      | 0.0667       | <0.0001              | 0.0003               |
| BMI (kg/m <sup>2</sup> )    | 0.6166       | 0.7728      | 0.0426       | <0.0001              | <.0001               |
| Waist circumference (mm)    | 0.2115       | 0.5582      | 0.0320       | 0.0002               | 0.0004               |
| Waist-hip ratio             | 0.3254       | 0.0574      | 0.1529       | 0.0338               | 0.0167               |
| Lean body mass (kg)         | 0.1213       | 0.2806      | 0.0355       | 0.0004               | 0.0013               |
| Fat mass (kg)               | 0.0765       | 0.2415      | 0.9543       | <0.0001              | <.0001               |
| Fat percent                 | 0.0320       | 0.9969      | 0.4035       | <0.001               | 0.0002               |
| Fasting blood sugar (mg/dl) | 0.8908       | 0.7781      | 0.0376       | 0.7171               | 0.5589               |
| Triglyceride (mg/dl)        | <.0001       | 0.0039      | 0.26253      | 0.6895               | 0.8048               |
| HDL-cholesterol (mg/dl)     | 0.0500       | 0.1080      | 0.0625       | 0.3499               | 0.3317               |
| Total cholesterol (mg/dl)   | 0.9621       | 0.6964      | 0.6128       | 0.2003               | 0.2112               |

<sup>a</sup> p-value derived from one-way ANOVA

<sup>b</sup> p-value derived from Kruskal-Wallis test

Supplementary table 3. Points in KIOM constitution analysis system

| Constitution | Points                   | Constitution | Points                 | Constitution | Points                  |
|--------------|--------------------------|--------------|------------------------|--------------|-------------------------|
| TE_1         | 42                       | SY_1         | 61                     | SE_1         | 61                      |
| TE_2         | 66                       | SY_2         | 42                     | SE_2         | 42                      |
| TE_3         | 61                       | SY_3         | 66.3                   | SE_3         | 79                      |
| TE_4         | 79                       | SY_4         | 42                     | SE_4         | 93                      |
| TE_5         | 61                       | SY_5         | 42                     | SE_5         | 74                      |
| TE_6         | 74                       | SY_6         | 42                     | SE_6         | 61                      |
| TE_7         | 73                       | SY_7         | 61                     | SE_7         | 66                      |
| TE_8         | 42                       | SY_8         | 42                     | SE_8         | 66                      |
| TE_9         | 42                       | SY_9         | 42                     | SE_9         | 74                      |
| TE_10        | 61                       | SY_10        | 42                     | SE_10        | 40                      |
| TE_11        | 42                       | SY_11        | 42                     | SE_11        | 61                      |
| TE_12        | 40                       | SY_12        | 42                     | SE_12        | 42                      |
| TE_13        | 66                       | SY_13        | 61                     | SE_13        | 61.4                    |
| TE_14        | 79                       |              |                        |              |                         |
| Mean (SD)    | 59.1(14.8) <sup>ab</sup> |              | 48.3(9.9) <sup>a</sup> |              | 63.1(15.4) <sup>b</sup> |
