# Supplementary material for: Comparison of Gut Microbiota between Sasang Constitutions
Source: Hindawi journal article supplement (doi:10.1155/2013/171643), 2013-01-01

Supplementary figure 1

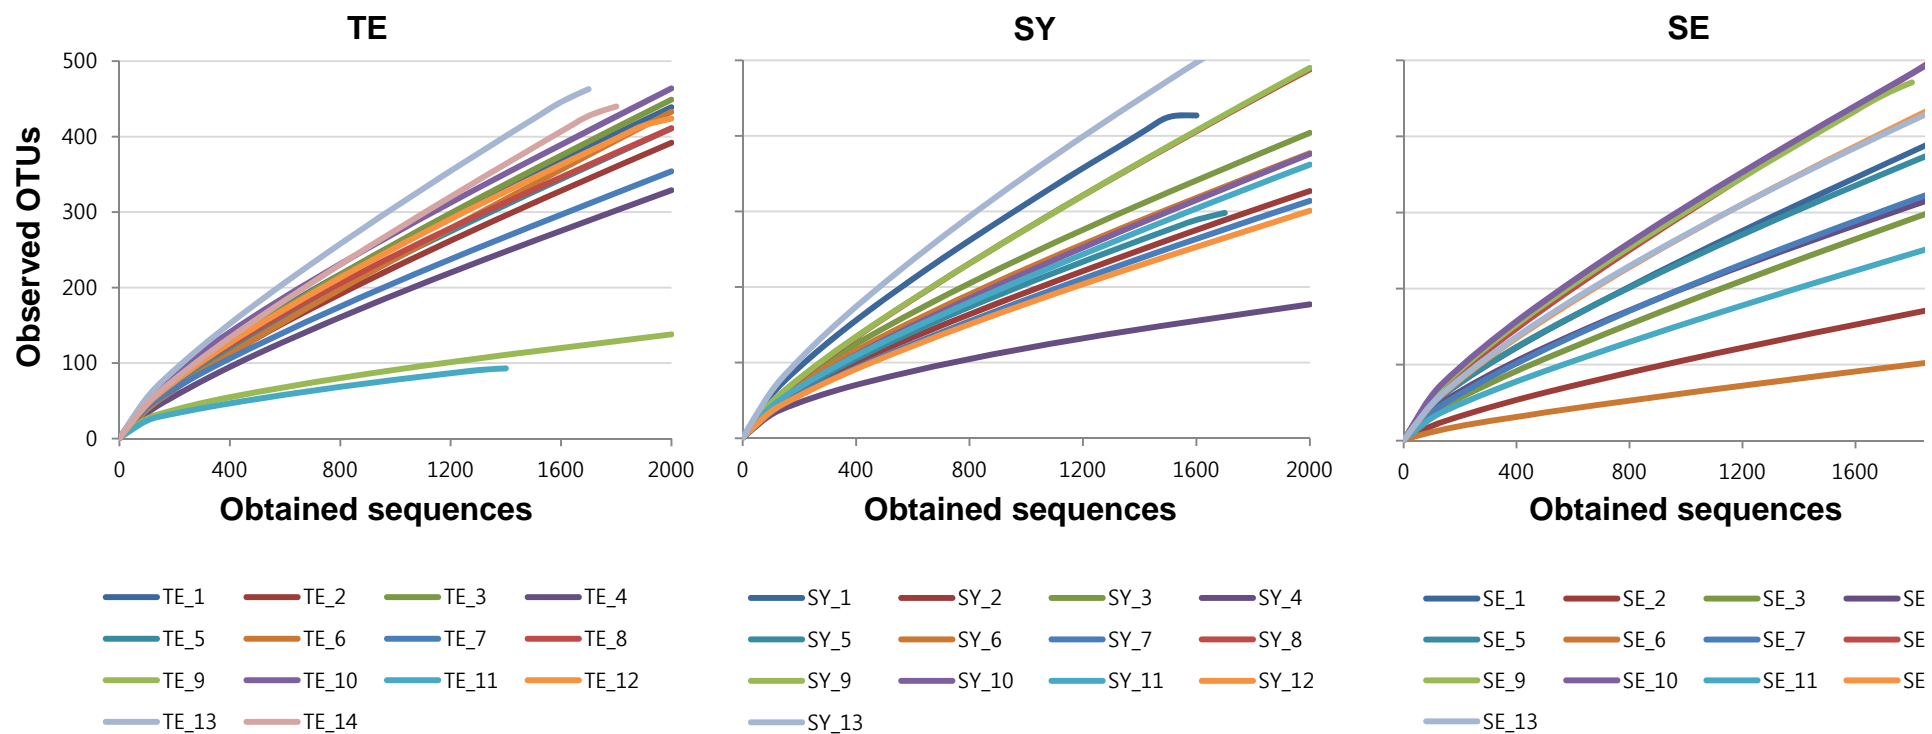

Supplementary figure 2

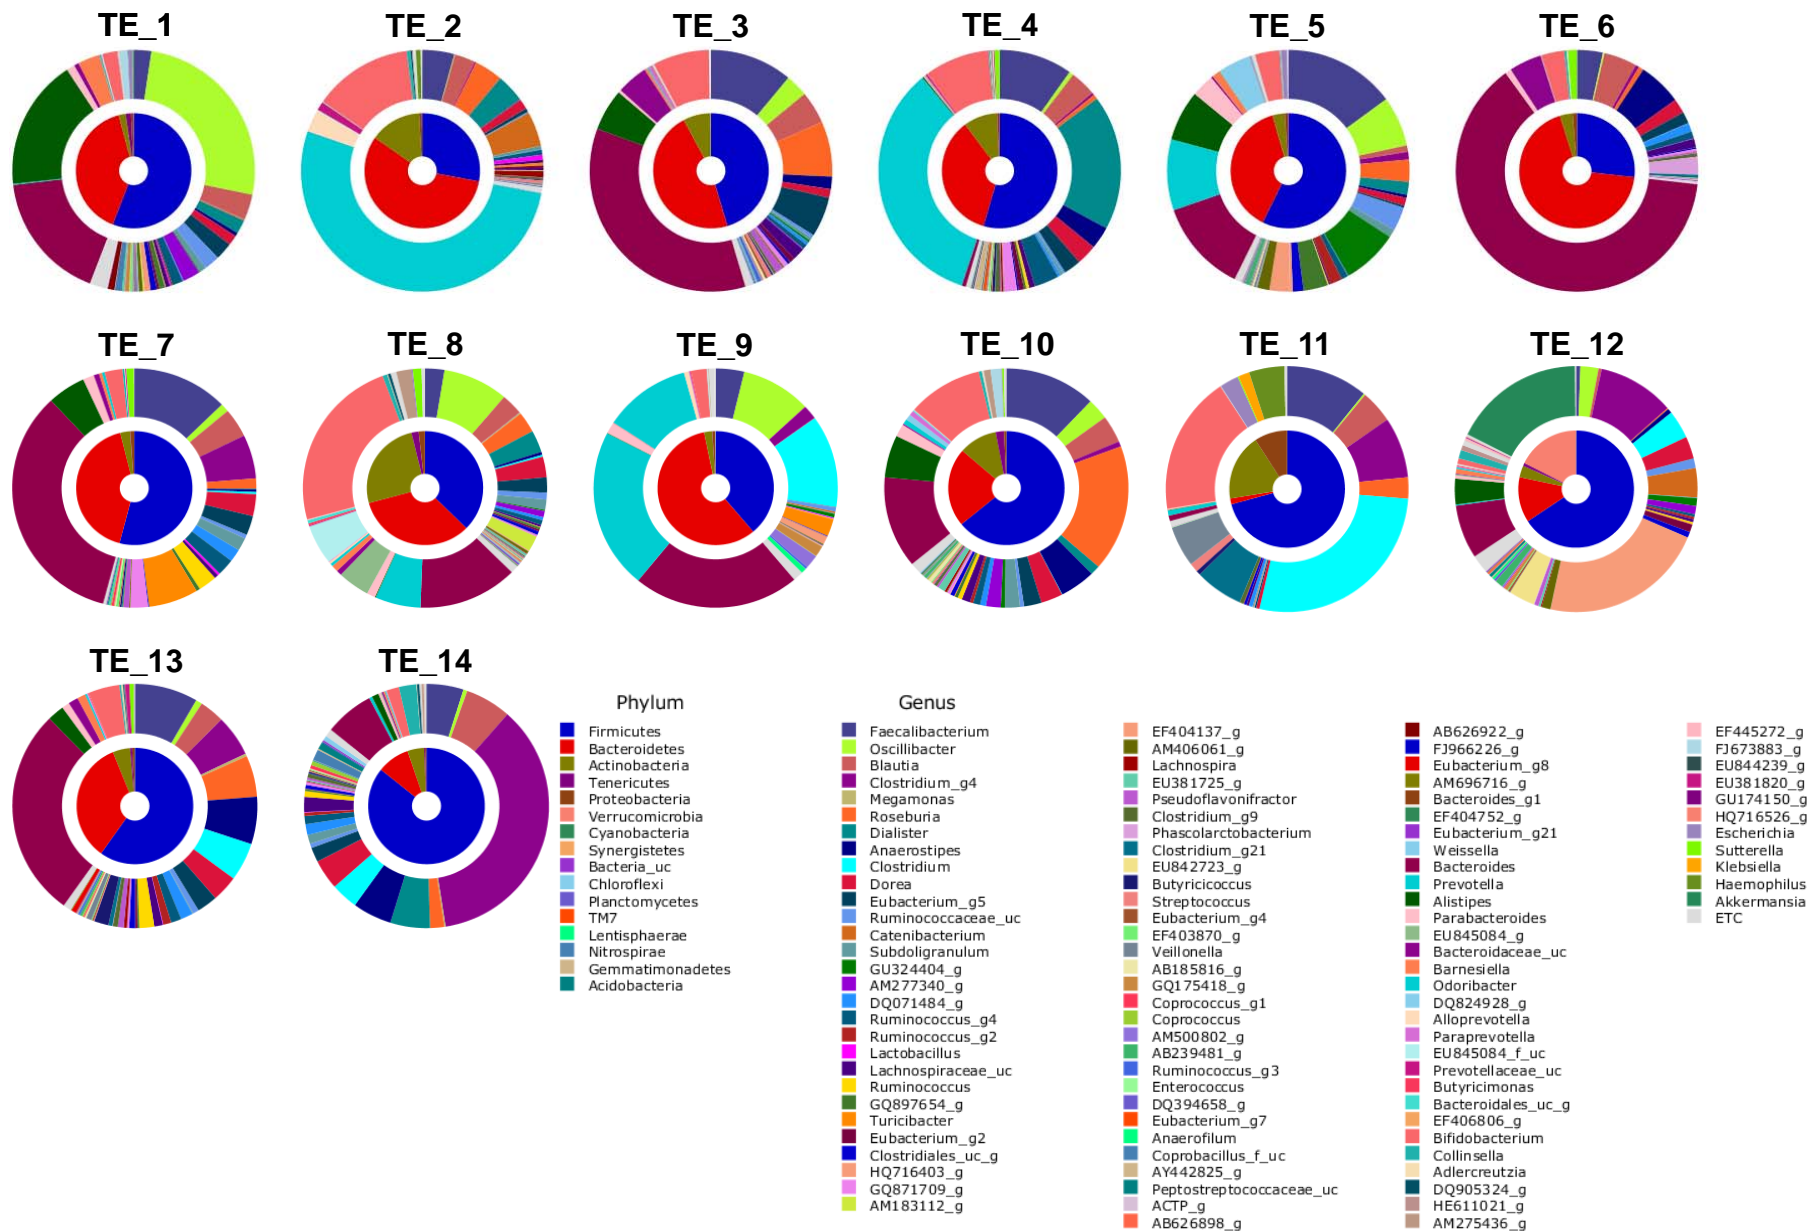

Supplementary figure 3

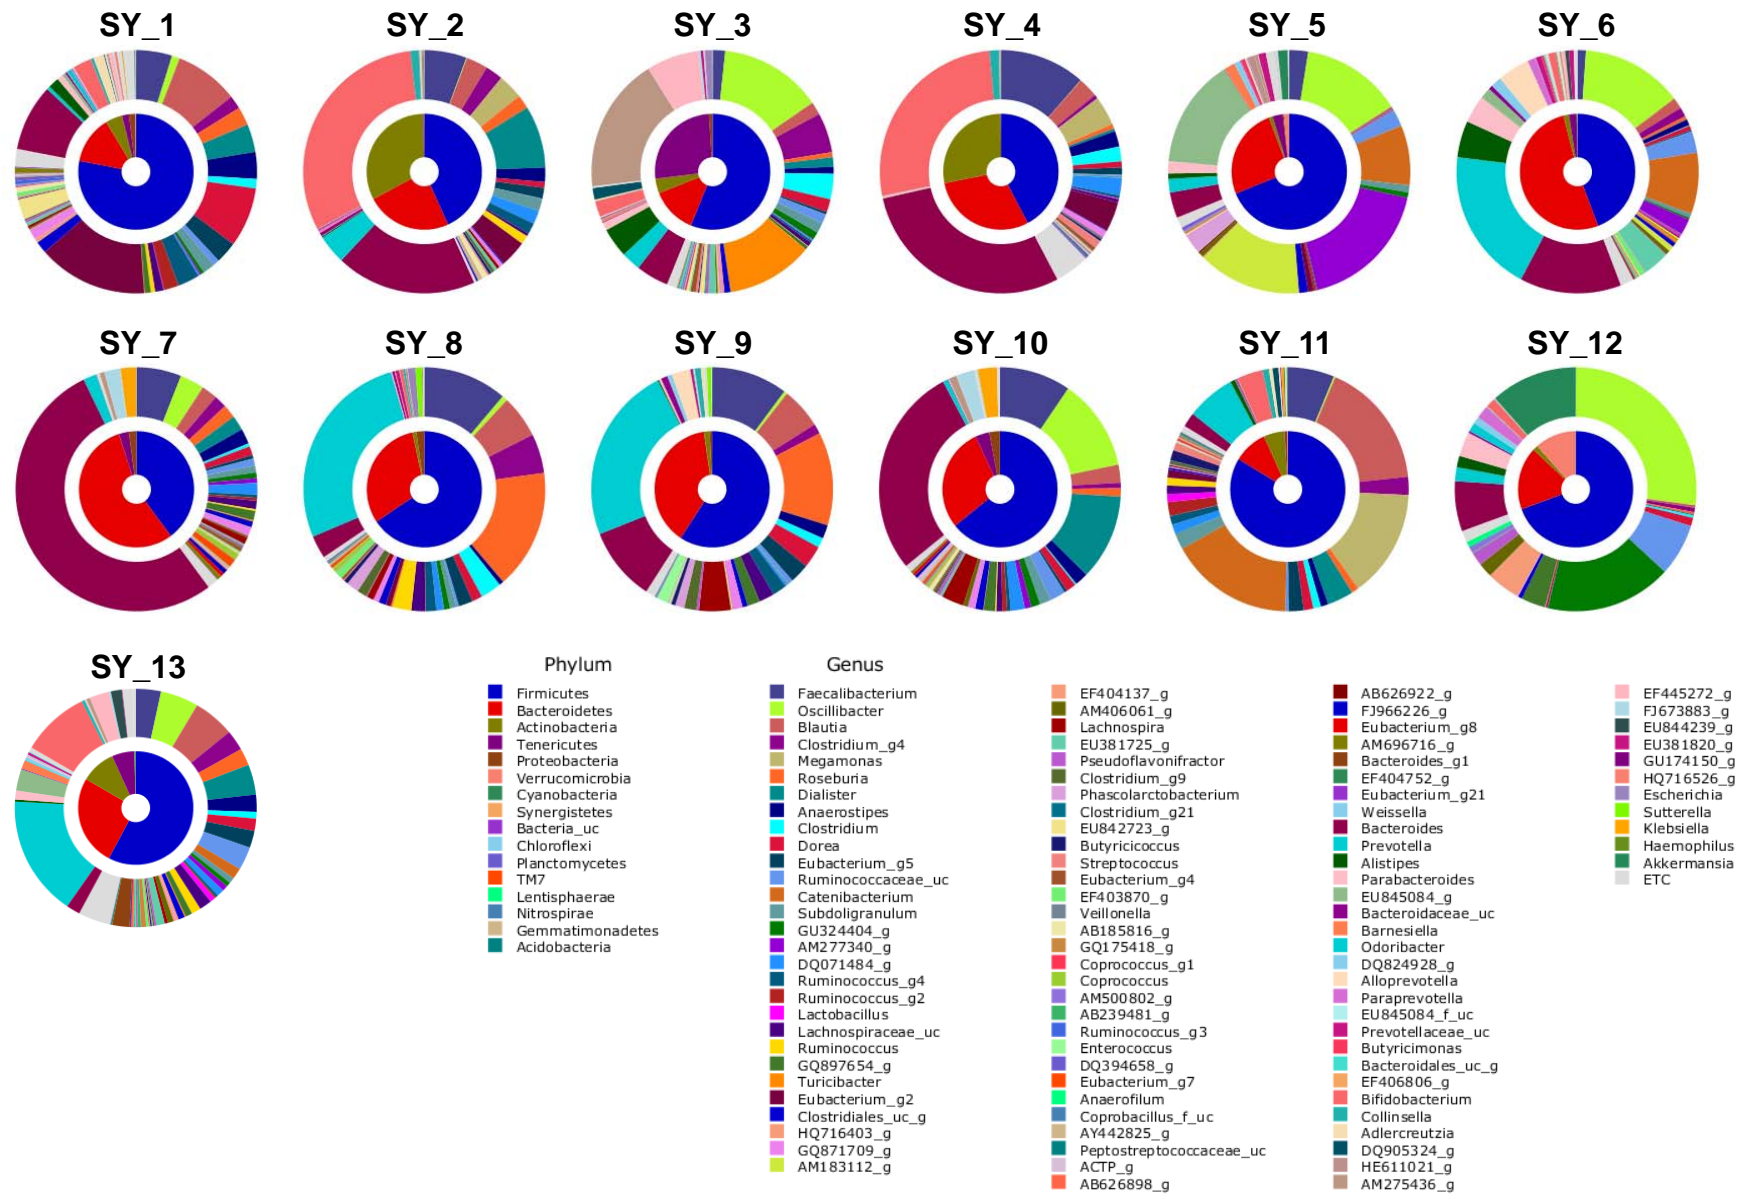

Supplementary figure 4

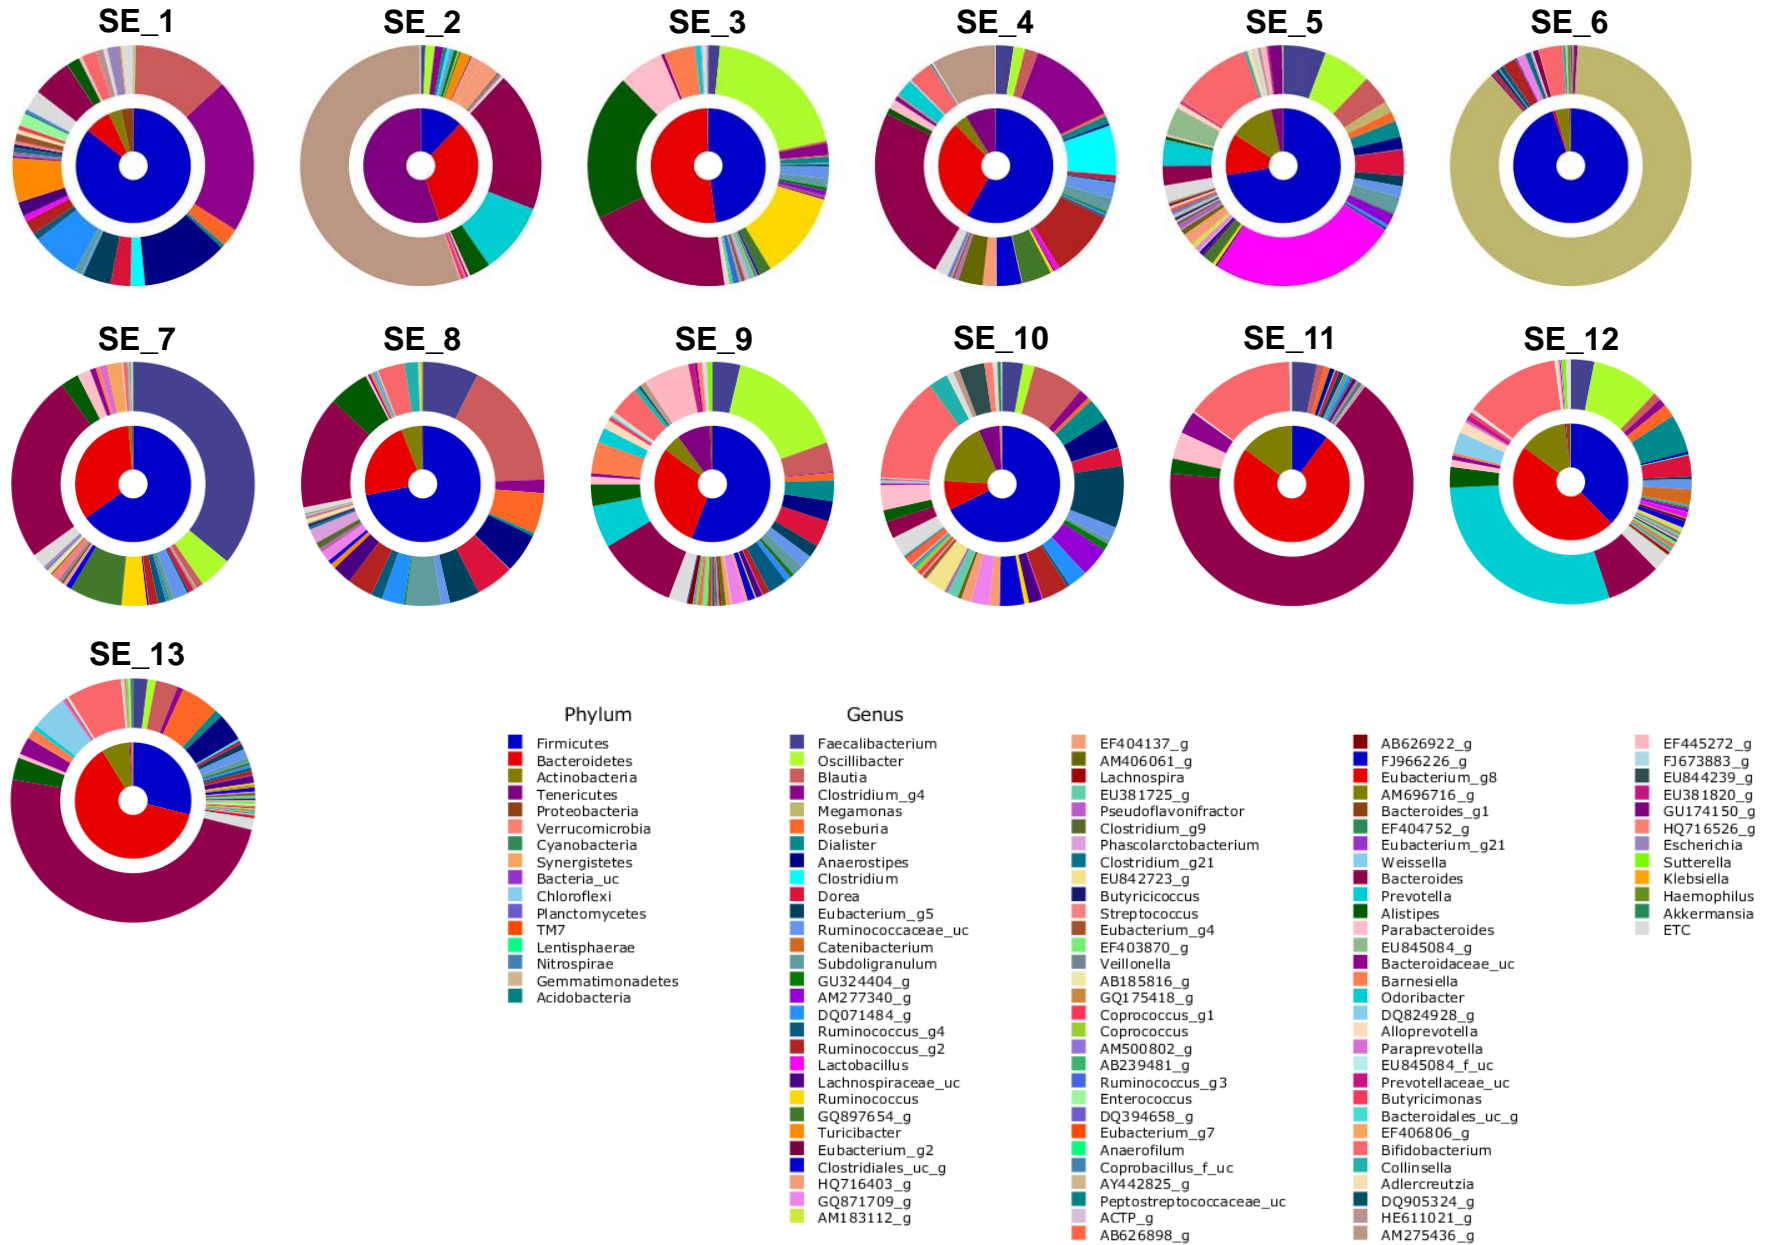

Supplement: f2 [file 171643.f2.pdf]
